# Supplementary material for: Cancer cell-mitochondria hybrid membrane coated Gboxin loaded nanomedicines for glioblastoma treatment
Source: Springer Nature journal article supplement (doi:10.1038/s41467-023-40280-3), 2023-07-28
Supplement: MOESM1 [file 41467_2023_40280_MOESM1_ESM.pdf]

# **Cancer cell-mitochondria hybrid membrane coated Gboxin loaded nanomedicines for glioblastoma treatment**

Yan Zou<sup>1,2</sup>, Yajing Sun<sup>1</sup>, Yibin Wang<sup>1</sup>, Dongya Zhang<sup>1</sup>, Huiqing Yang<sup>1</sup>, Xin Wang<sup>1</sup>, Meng Zheng<sup>1</sup>, Bingyang Shi<sup>1,2\*</sup>

<sup>1</sup>Henan-Macquarie University Joint Centre for Biomedical Innovation, Henan Key Laboratory of Brain Targeted Bio-nanomedicine, School of Life Sciences, Henan University, Kaifeng, Henan, 475004, China

<sup>2</sup>Centre for Motor Neuron Disease Research, Macquarie Medical School, Faculty of Medicine, Human Health Sciences, Macquarie University, Sydney, NSW 2109, Australia

\*Corresponding author. [bingyang.shi@mq.edu.au](mailto:bingyang.shi@mq.edu.au) (B. Shi).

**Supplementary Table 1.** Characterization of nanoparticles with different theoretical drug loading content

| Theoretical drug loading content (%) | DLE <sup>a</sup> (%) | DLC <sup>a</sup> (%) | Size <sup>b</sup> (nm) | PDI <sup>b</sup> | Zeta <sup>c</sup> (mV) |
|--------------------------------------|----------------------|----------------------|------------------------|------------------|------------------------|
| 10                                   | 41.5                 | 4.4                  | 63.4±0.5               | 0.21±0.01        | 2.9±0.2                |
| 20                                   | 70.4                 | 15.0                 | 67.3±2.1               | 0.19±0.07        | 4.1±0.9                |
| 30                                   | 44.9                 | 16.1                 | 72.5±1.4               | 0.19±0.02        | 8.3±0.2                |

<sup>a</sup>Determined by HPLC, mobile phase: A: ddH<sub>2</sub>O (0.01% TFA), B: acetonitrile (0.01% TFA), gradient: 5% to 95% B within 1.3 min, 95% to 5% B from 1.3 min to 3.0 min, flow rate: 1.8 mL min<sup>-1</sup>, injection volume: 10 µL, Colum: SunFire C18 (50 mm × 4.6 mm, 3.5 µm), oven temperature: 45 °C.

<sup>b</sup>Determined by DLS (10 mW He-Ne laser, 633 nm wavelength), <sup>c</sup> determined using Zetasizer Nano-ZS (Malvern instruments) at 25 °C in HEPES buffer (pH 7.4, 10 mM).

**Supplementary Table 2.** Characterization of membrane coated nanoparticles

| Entry    | Size <sup>a</sup> (nm) | PDI <sup>a</sup> | Zeta <sup>b</sup> (mV) |
|----------|------------------------|------------------|------------------------|
| HM-NPs@G | 89.1 ±1.5              | 0.22±0.01        | -25.6±0.3              |
| MM-NPs@G | 88.2 ±0.7              | 0.17±0.01        | -24.3±0.2              |
| CM-NPs@G | 93.3 ±1.9              | 0.19±0.02        | -24.9±0.6              |

Theoretical drug loading content (DLC) of Gboxin is 20 wt.%.

<sup>a</sup>Determined by DLS (10 mW He-Ne laser, 633 nm wavelength), <sup>b</sup> determined using Zetasizer Nano-ZS (Malvern instruments) at 25 °C in HEPES buffer (pH 7.4, 10 mM).

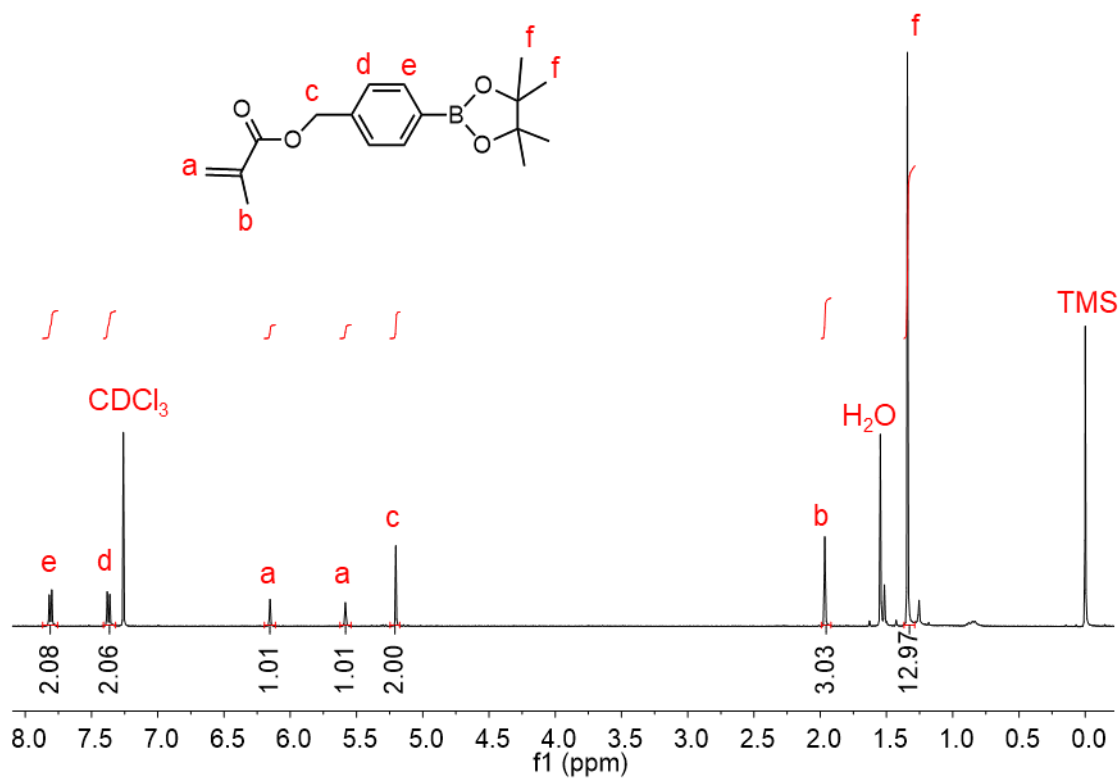

**Supplementary Figure 1** <sup>1</sup>H NMR analysis of HB monomer. <sup>1</sup>H NMR spectrum of HB monomer (CDCl<sub>3</sub>, 400 MHz).

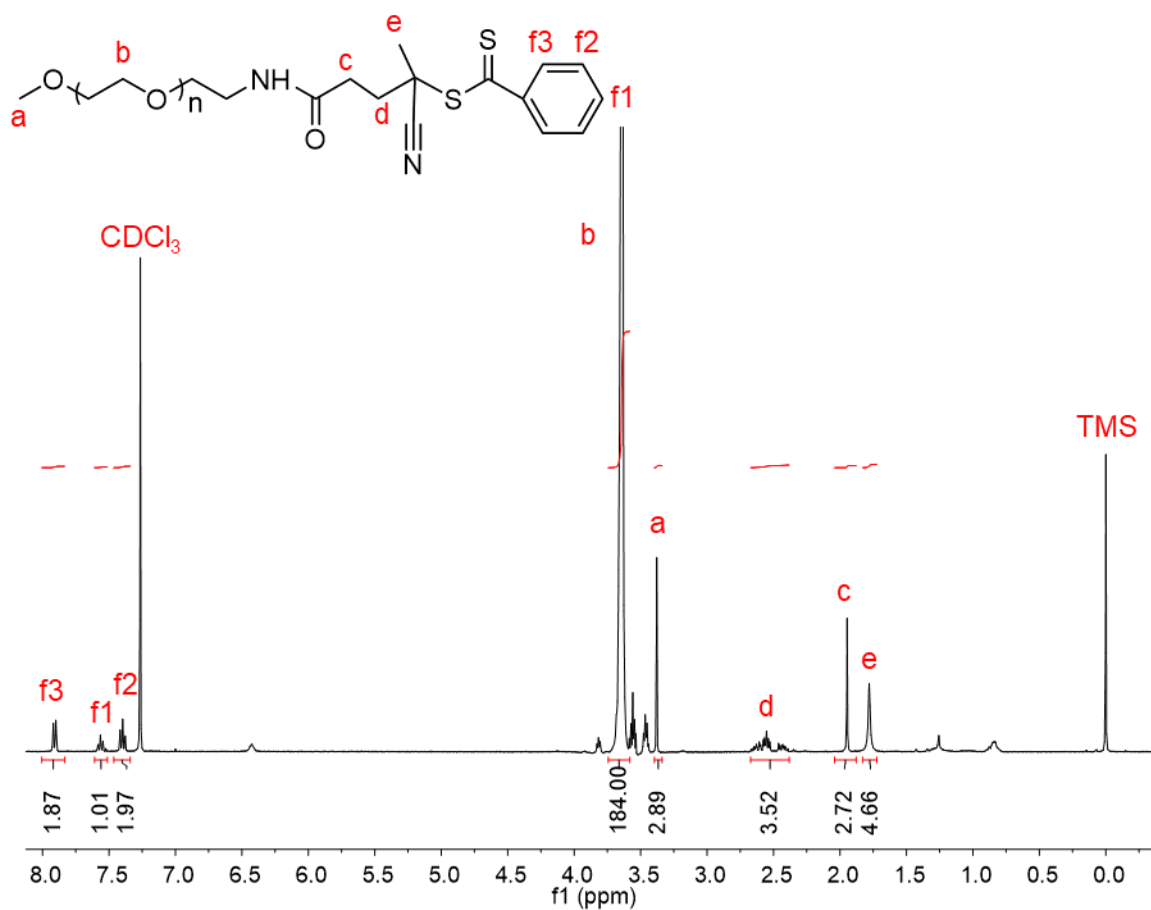

**Supplementary Figure 2** <sup>1</sup>H NMR analysis of PEG-RAFT. <sup>1</sup>H NMR spectrum of PEG<sub>2k</sub>-RAFT (CDCl<sub>3</sub>, 400 MHz).

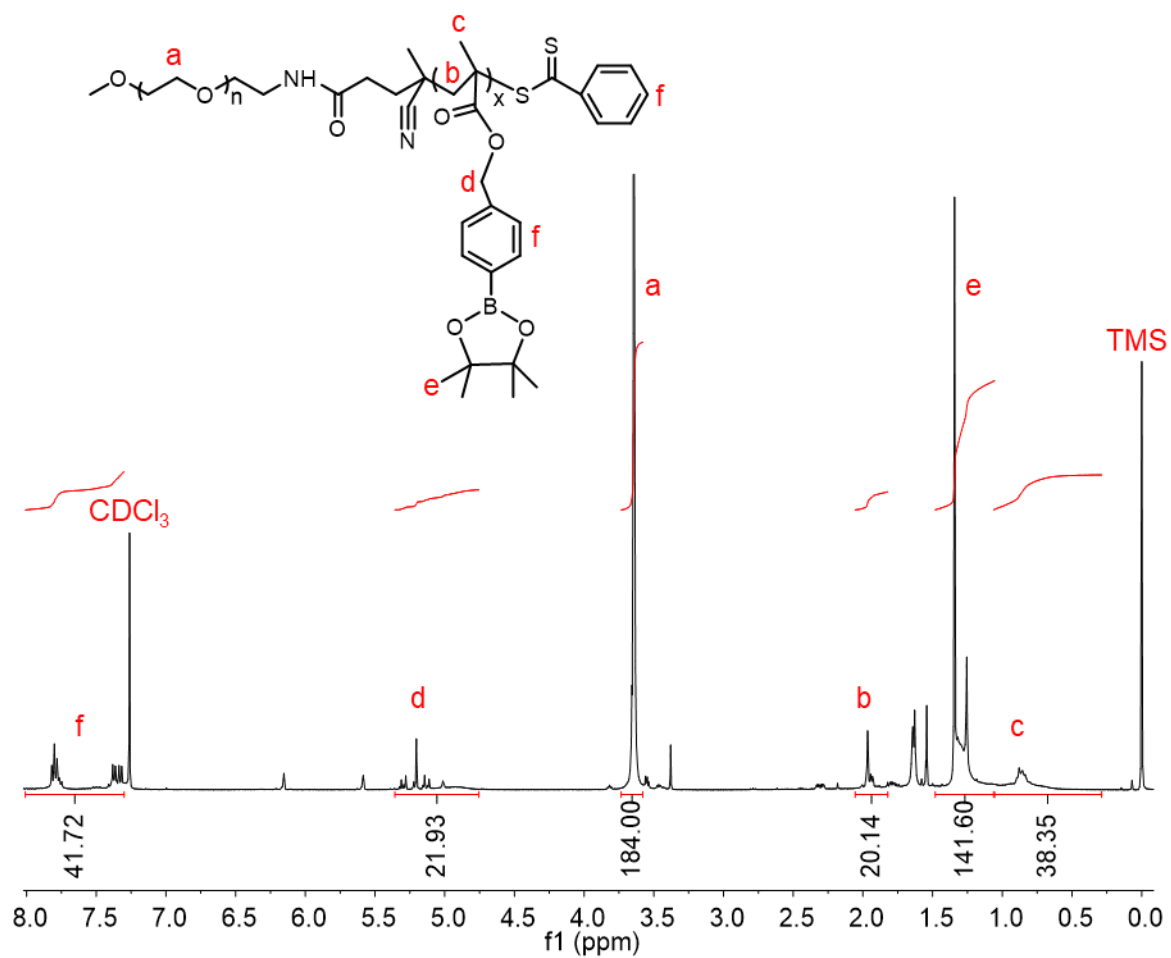

**Supplementary Figure 3**  $^1\text{H}$  NMR analysis of PEG-PHB.  $^1\text{H}$  NMR spectrum of PEG-PHB block polymer ( $\text{CDCl}_3$ , 400 MHz).

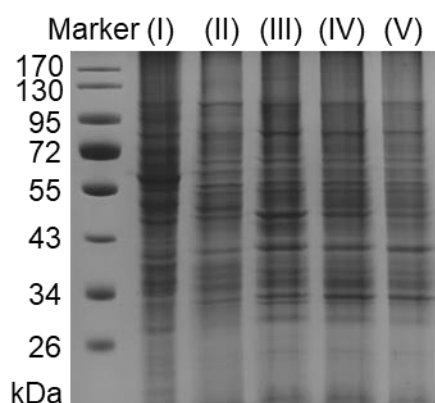

**Supplementary Figure 4 SDS-PAGE protein detection.** SDS-PAGE protein analysis of U87MG cancer cell lysates (I), CM (II), MM (III), HM (IV) and HM from after HM-NPs@G treatment (V). Samples were run at equal protein concentration and stained with Coomassie Blue. SDS-PAGE protein analysis was representative data from three independent experiments.

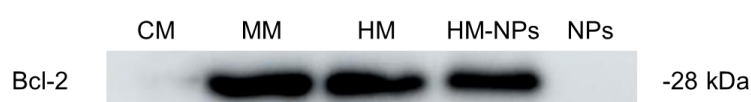

**Supplementary Figure 5 Bcl-2 expression analysis.** Western blot analysis showing the Bcl-2 expression on the cancer cell membrane (CM), mitochondria membrane (MM), cancer cell-mitochondria hybrid membrane (HM), hybrid membrane coated nanoparticles (HM-NPs), and NPs, respectively. The immunoblot was representative data from three independent experiments.

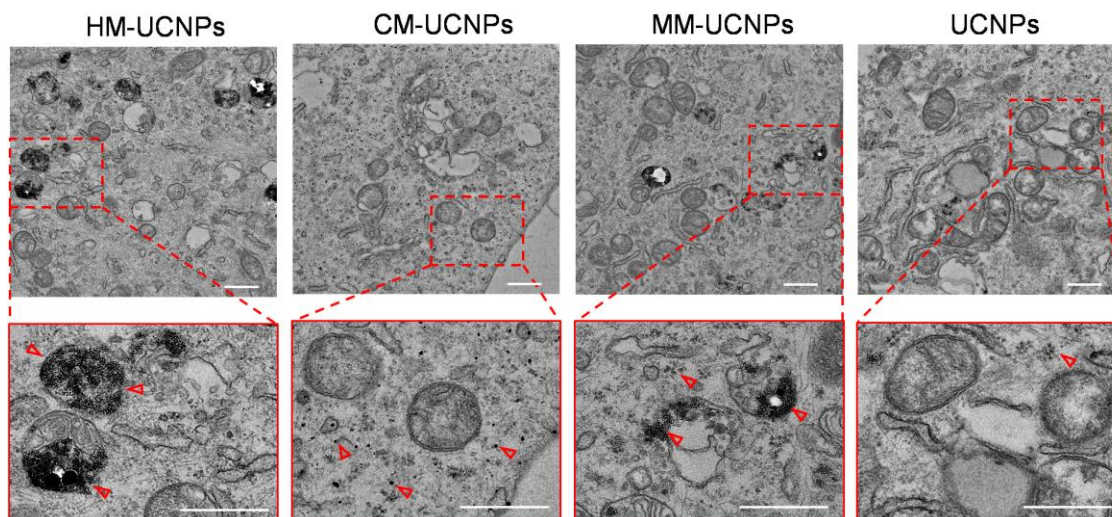

**Supplementary Figure 6 Co-localization analysis by Bio-TEM.** TEM images of mitochondria in U87MG cells treated with HM-UCNPs, CM-UCNPs, MM-UCNPs and bare UCNPs. UCNPs: 1 mg/mL. Scale bar = 500 nm. The red arrows indicated the UCNPs. The TEM images were representative data from three independent experiments.

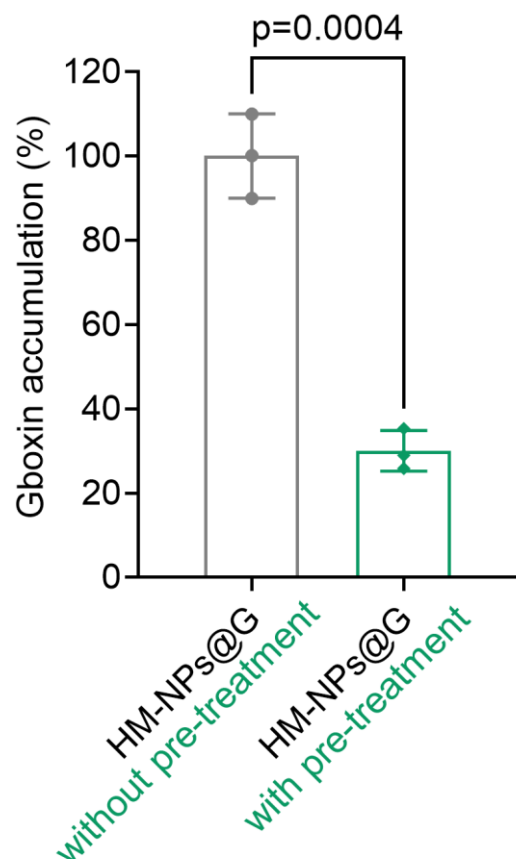

**Supplementary Figure 7 Mitochondria targeting and penetrating analysis of HM-NPs@G in vitro.** The content of Gboxin in mitochondria isolated from U87MG cells, with or without MFI8 pre-treatment, followed by incubated with HM-NPs@G for 24 h (Gboxin:  $20 \mu\text{g mL}^{-1}$ ,  $n = 3$ ). Free MFI8 was pre-incubated with U87MG cells for 6 h (MFI8:  $5 \mu\text{M}$ ). The Gboxin accumulation of HM-NPs@G with pre-treatment is relative to the HM-NPs@G without pre-treatment. ( $n = 3$  biologically independent samples). Data are presented as mean  $\pm$  SD. (Statistical analysis was performed using two-sample t-test). Source data are provided as a Source Data file.



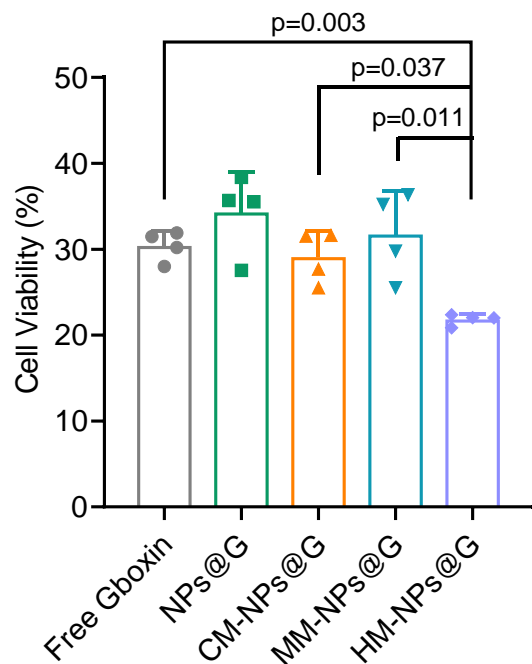

**Supplementary Figure 8 Cell viability analysis of X01 cells treated with different treatments.** Cell viability of X01 after 72 h incubation with HM-NPs@G, MM-NPs@G, CM-NPs@G and free Gboxin (Gboxin: 800 nM). Data were normalized to cells incubated with PBS (n=4). Data are presented as mean  $\pm$  SD (n = 4 biologically independent samples; one-way ANOVA and Tukey's multiple comparison test). Source data are provided as a Source Data file.

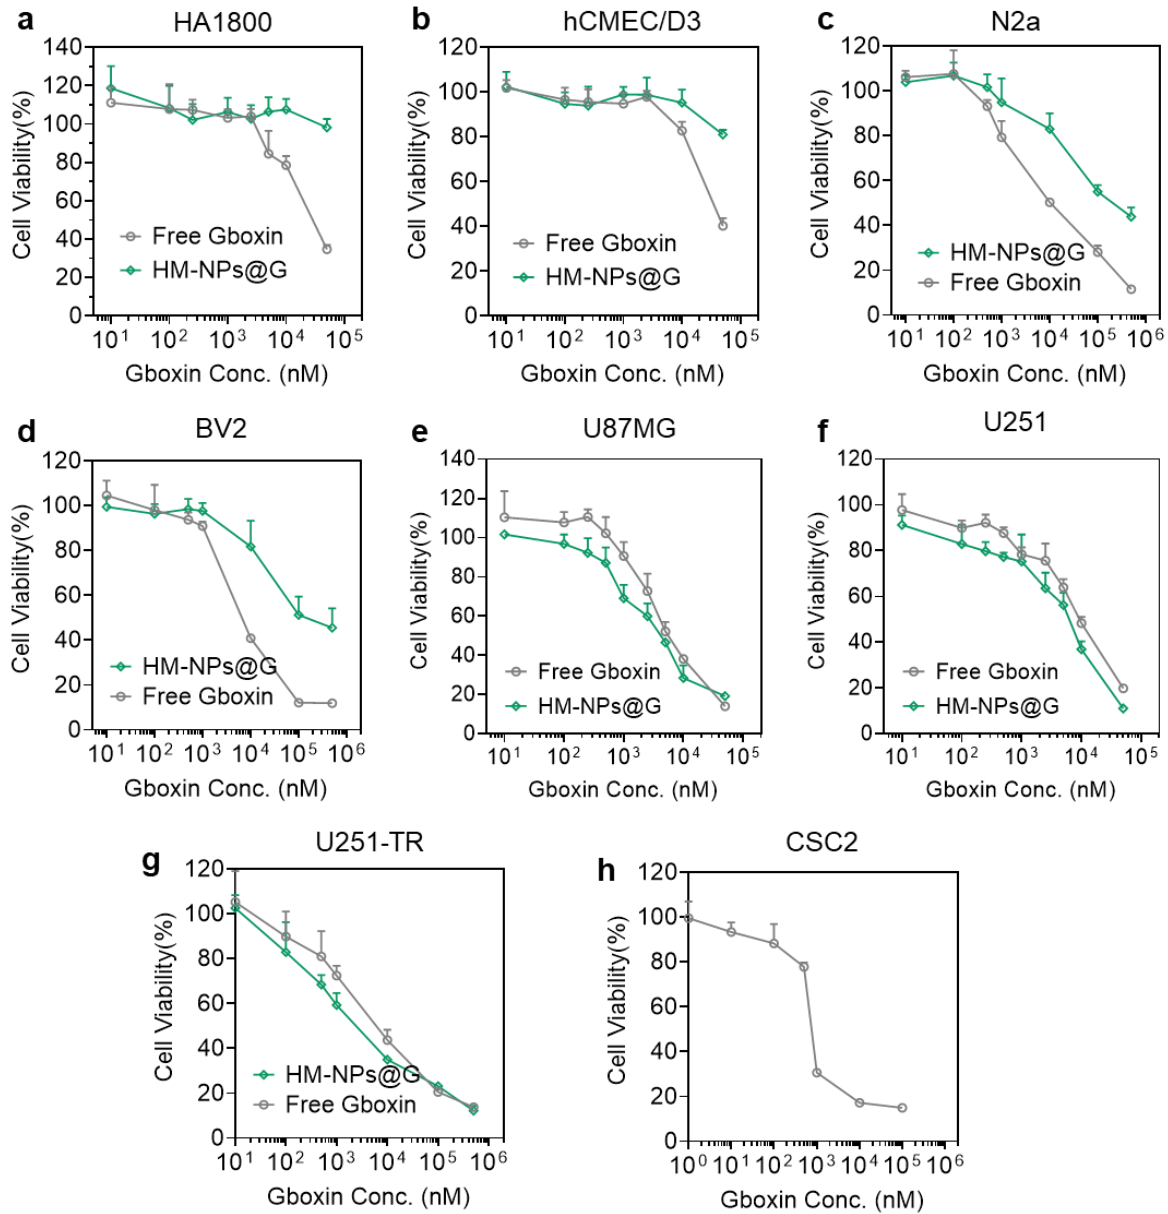

**Supplementary Figure 9 IC<sub>50</sub> assay in different cell lines.** IC<sub>50</sub> analysis of normal cells including **(a)** HA1800 (n = 5 biologically independent samples), **(b)** hCMEC/D3 (n = 5 biologically independent samples), **(c)** N2a (n = 5 biologically independent samples), and **(d)** BV2 cell lines (n = 4 biologically independent samples), glioblastoma tumor cells ((**e**) U87MG (n = 4 biologically independent samples), (**f**) U251 (n = 5 biologically independent samples) and (**g**) U251-TR cell lines (n = 5 biologically independent samples)) as well as (**h**) glioblastoma stem cells (X01) (n = 4 biologically independent samples) after 72 h incubation

with HM-NPs@G and free Gboxin. Data were normalized to cells incubated with PBS. Data are presented as mean  $\pm$  SD. Source data are provided as a Source Data file.

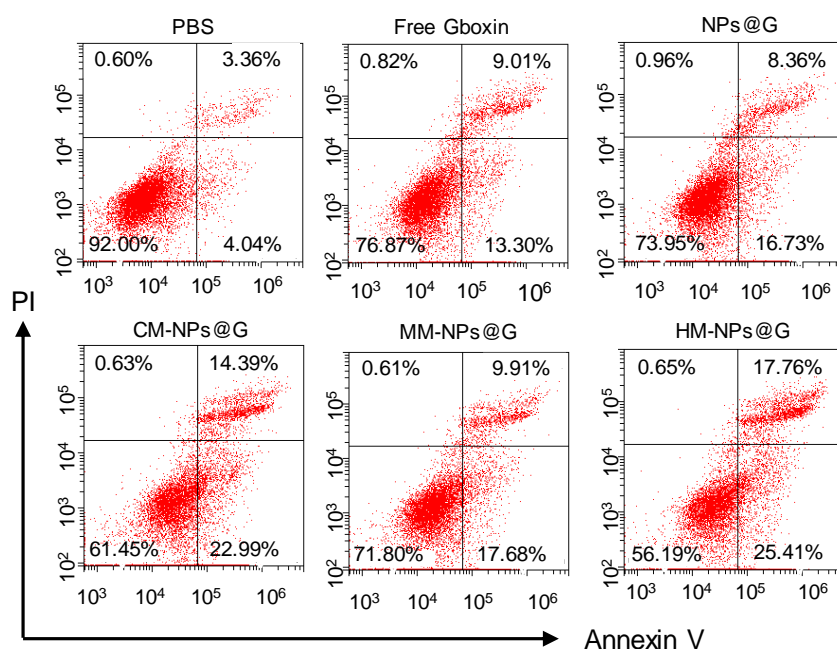

**Supplementary Figure 10 Apoptosis analysis of U87MG cells.** Apoptosis analysis of U87MG cells after 72 h incubation with free Gboxin, NPs@G, CM-NPs@G, MM-NPs@G, or HM-NPs@G (Gboxin: 800 nM). The apoptosis analyses were representative data from three independent experiments.

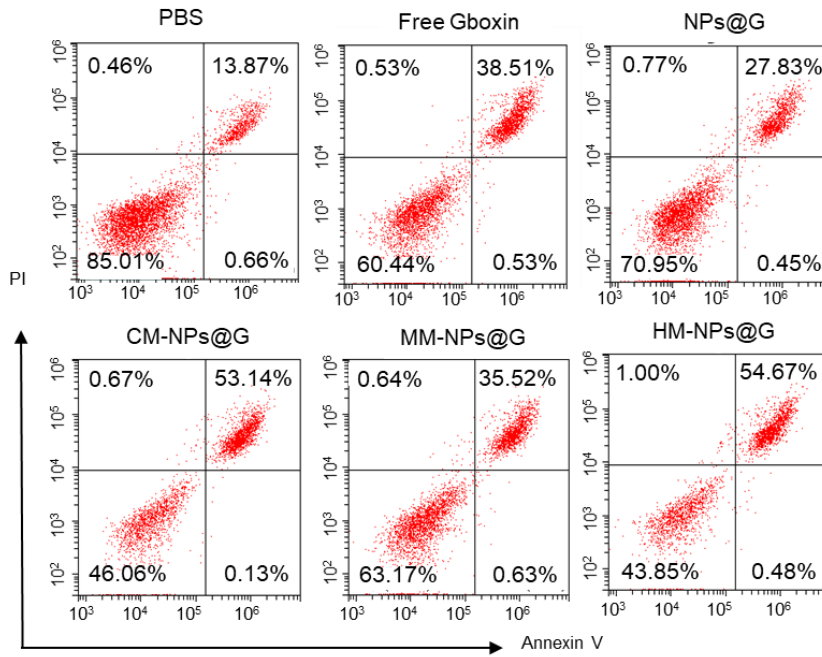

**Supplementary Figure 11 Apoptosis analysis of X01 cells.** Cell apoptosis of GBM stem cells (GSCs) X01 after 72 h incubation with HM-NPs@G, MM-NPs@G, CM-NPs@G and free Gboxin (Gboxin: 800 nM). The apoptosis analyses were representative data from three independent experiments.

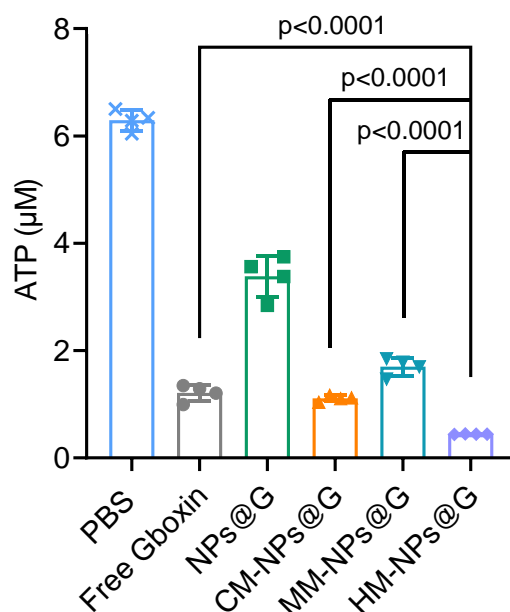

**Supplementary Figure 12 ATP level detection of X01 cells treated with different treatments.** ATP level of X01 cells when treated with HM-NPs@G, MM-NPs@G, CM-NPs@G, free Gboxin (Gboxin: 800 nM) and PBS for 72 h (n=4 biologically independent samples). Data are presented as mean  $\pm$  SD (one-way ANOVA and Tukey multiple comparisons tests). Source data are provided as a Source Data file.

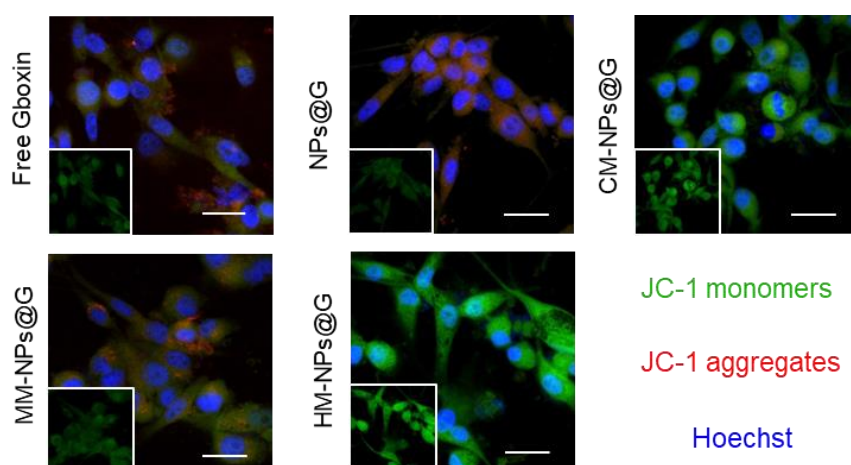

**Supplementary Figure 13 Mitochondria membrane potential assay after HM-NPs@G treatment by JC-1 kit.** CLSM images of U87MG cells stained with JC-1 after treatment with different formulations for 72 h. (JC-1 monomers (green), JC-1 aggregates (red), Hoechst (blue)). Scale bar = 20  $\mu$ m. The potential analyses were representative data from three independent experiments.

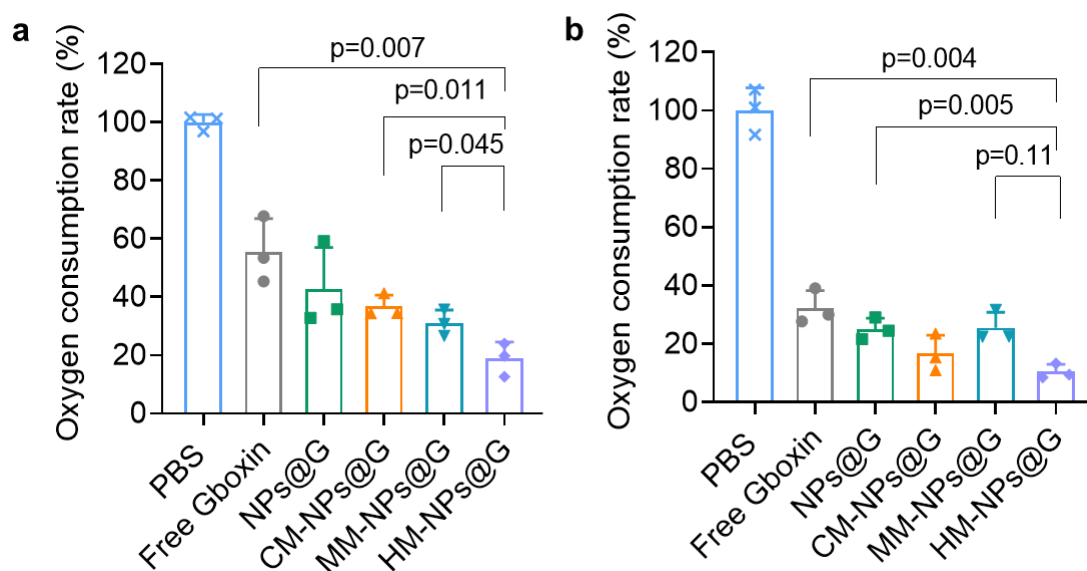

**Supplementary Figure 14 Oxygen consumption rate analysis in U87MG and GSCs X01 cells in vitro.** The rate of oxygen consumption within 2 h in U87MG (n = 3 biologically independent samples) **(a)** and X01 cells (n = 3 biologically independent samples) **(b)** treated with HM-NPs@G, MM-NPs@G, CM-NPs@G, NPs@G and free Gboxin was analysed. Data are presented as mean  $\pm$  SD (one-way ANOVA and Tukey multiple comparisons tests). Source data are provided as a Source Data file.

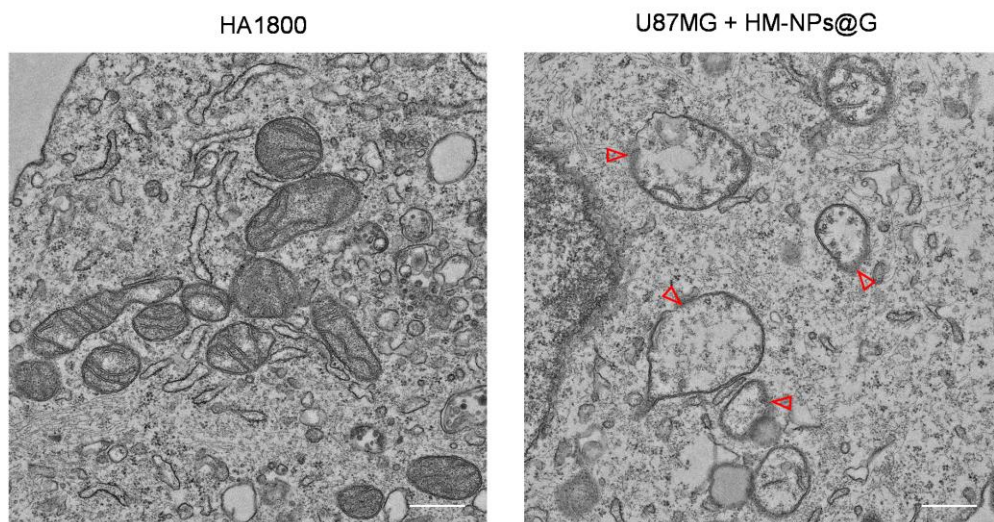

**Supplementary Figure 15 Mitochondria morphology analysis of normal cells and HM-NPs@G treated GBM cells using Bio-TEM.** TEM images of mitochondria in normal cells (HA1800) and U87MG cells treated with HM-NPs@G. The red arrows indicated the damaged construction of mitochondria after treatment of nanomedicines. Scale bar = 500 nm. The TEM images were representative data from three independent experiments.

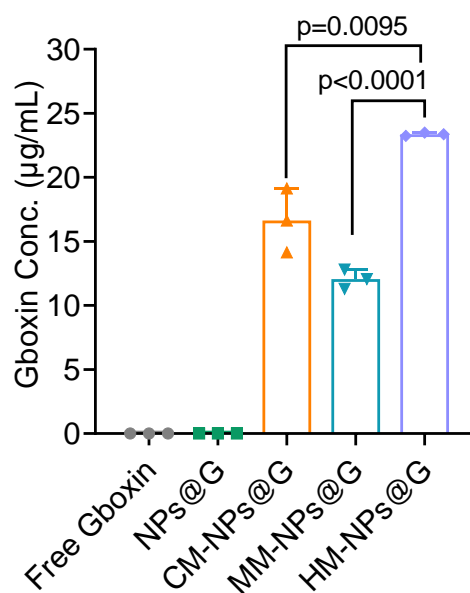

**Supplementary Figure 16 Gboxin accumulation ratio analysis in the mitochondria of U87MG cells treated with different formulations in vitro.** The accumulation ratio of Gboxin was detected with HPLC in mitochondria of U87MG cells treated with HM-NPs@G, MM-NPs@G, CM-NPs@G, NPs@G and free Gboxin for 24 h (n=3 biologically independent samples). Data are presented as mean  $\pm$  SD (one-way ANOVA and Tukey multiple comparisons tests). Source data are provided as a Source Data file.

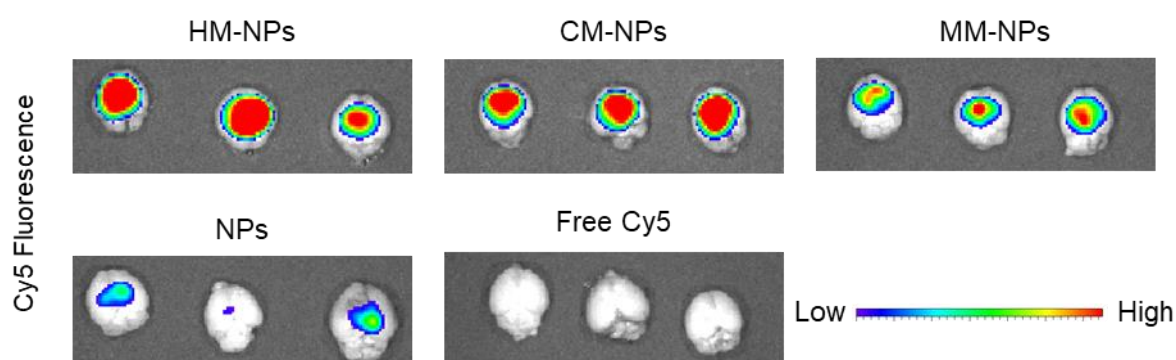

**Supplementary Figure 17 Ex vivo imaging analysis.** Cy5 fluorescence images of GBM brains taken from U87MG-Luc bearing mice at 6 h post i.v. injection of HM-NP@Cy5 (1 mg Cy5 equiv.  $\text{kg}^{-1}$ , n = 3 mice in each group).



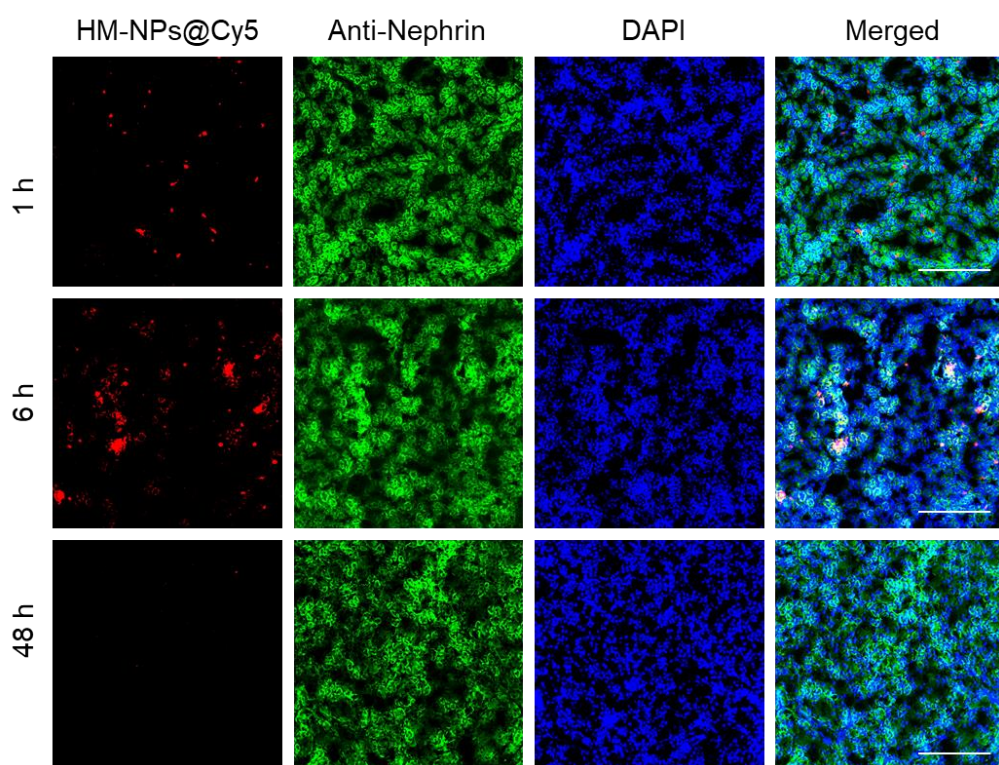

**Supplementary Figure 18 Tissue-level distribution in renal corpuscles of HM-NPs.**

Immunofluorescence images of kidney taken from healthy BALB/c mice 1 h, 6 h, and 48 h post injection of HM-NPs@Cy5 (2 mg Cy5 equiv.  $\text{kg}^{-1}$ ). (Nuclei were stained with DAPI (blue) and renal glomerulus with Anti-Nephrin Rabbit pAb (green); Cy5 fluorescence is red. Scale bars = 100  $\mu\text{m}$ . The immunofluorescence analyses were representative data from three mice.

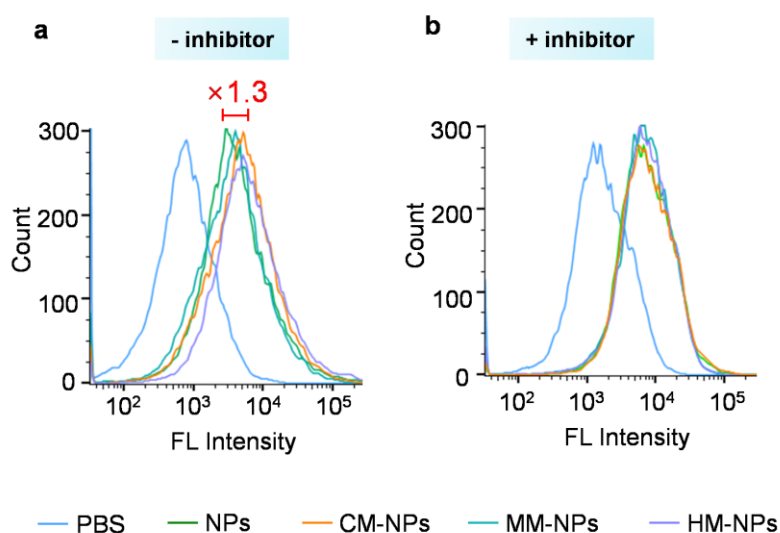

**Supplementary Figure 19 BBB penetration and cellular uptake analysis in vitro.** The fluorescence intensities were detected with flow cytometry of U87MG cells after nanoparticles traversed the BBB without **(a)** or with **(b)** 8-CPT-cAMP and Ro 20-1724 pretreatments (FITC concentration:  $10 \mu\text{g mL}^{-1}$ ). The flow cytometry analyses were representative data from three independent experiments.

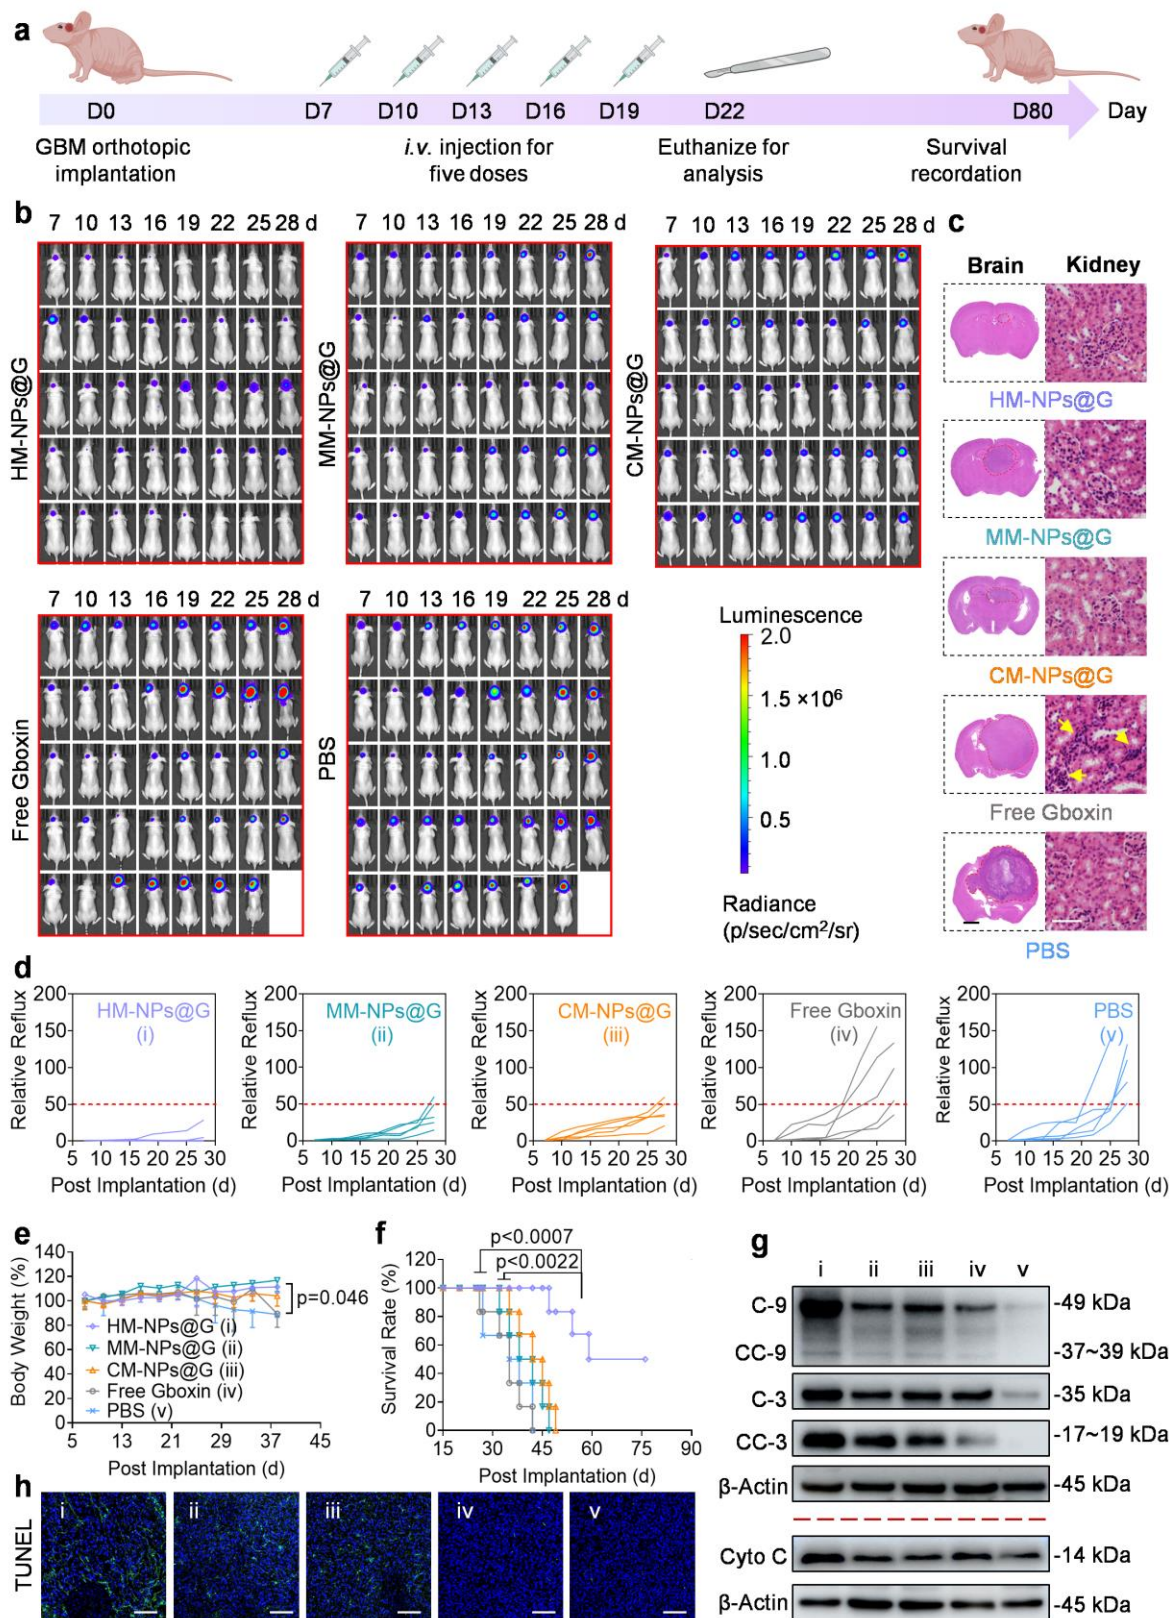

**Supplementary Figure 20 In vivo antitumour activity of HM-NPs@G in mice bearing orthotopic U87MG-Luc GBM tumour.** **a**, Schematic illustration shows study treatment

schedule. **b**, Time course bioluminescence images of mice bearing orthotopic U87MG-Luc bearing tumour and treated with HM-NPs@G, MM-NPs@G, CM-NPs@G, free Gboxin, or PBS (n = 5 mice in each group). The mice were intravenously injected at a dose of 3 mg Gboxin equiv.  $\text{kg}^{-1}$  on days 7, 10, 13, 16, and 19 post tumour implantations. **c**, H&E images of the whole brain (Scale bar = 2 mm) and kidney (Scale bar = 40  $\mu\text{m}$ ) excised from the representative mice in following treatments as described above on day 22. The histological analyses were representative data from three mice. **d**, Quantified luminescence levels of mice using the Lumina IVIS III system (n = 5 mice in each group). **e**, Body weight profile assessment p (n = 5 mice in each group). Data are presented as mean  $\pm$ SD (one-way ANOVA and Tukey multiple comparisons tests). **f**, Mice survival rate curves. Statistical analysis: HM-NPs@G vs. MM-NPs@G or CM-NPs@G, \*p < 0.05, HM-NPs@G vs. free Gboxin or PBS, \*\*p < 0.01 (n=6 mice in each group, Kaplan-Meier analysis, log-rank test). **g**, Western blot analysis of apoptosis associated proteins and Cyto C in tumour tissues excised from the mice on day 22 The immunoblots were representative data from three independent experiments. **h**, Histological analysis using the TUNEL assay The histological analyses were representative data from three mice. Green: apoptotic cells; blue: Hoechst-stained cell nuclei (scale bar = 100  $\mu\text{m}$ ). Source data are provided as a Source Data file.



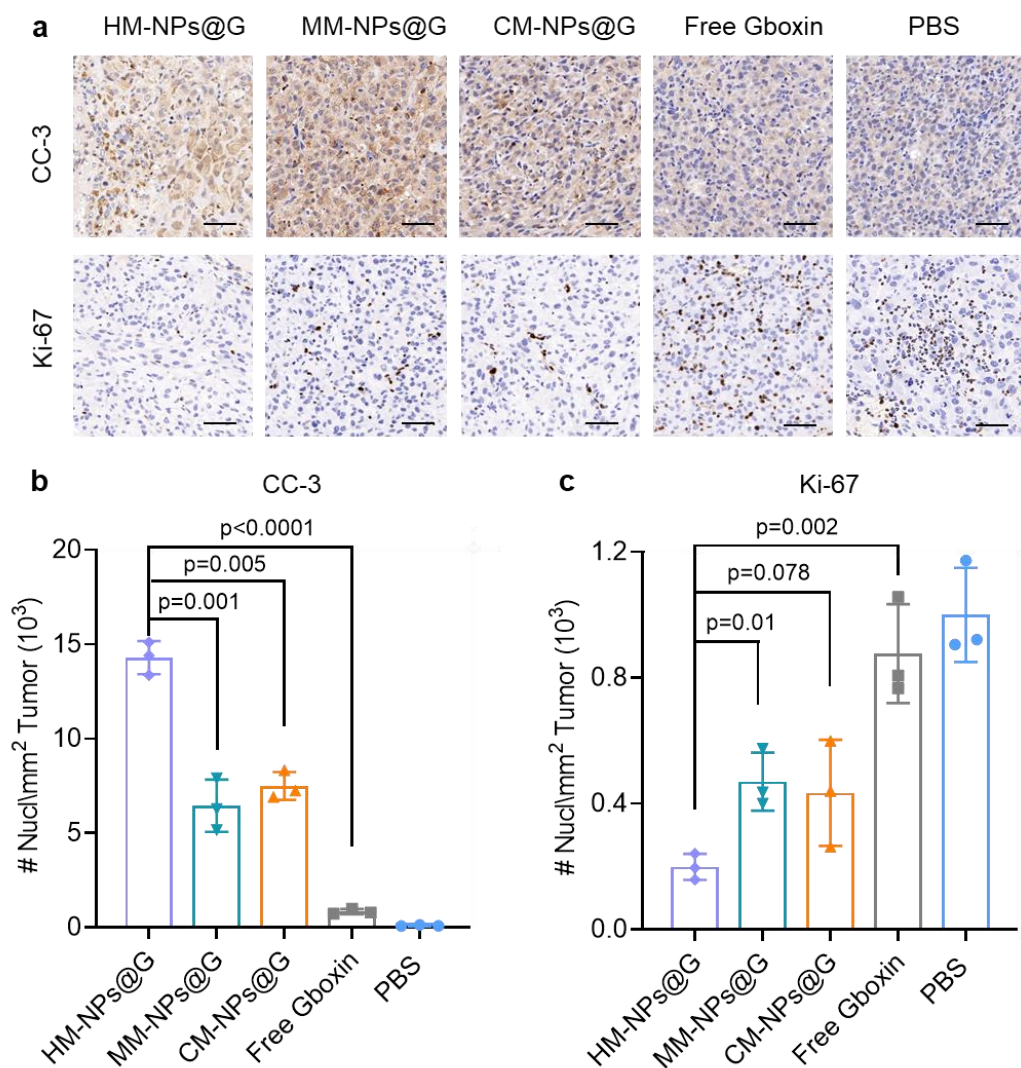

**Supplementary Figure 21 Apoptosis and proliferation immunohistochemistry analysis of tumors after different treatments.** (a) Cleaved caspase 3 (CC-3) and proliferation (Ki-67) immunohistochemistry of tumor slices excised from U87MG-Luc mice following different treatments. Quantification of tumor cells staining positive for CC-3 (b) and Ki-67 (c), Signal intensity was quantified from > 300 cells in tumors from three mice per treatment condition using ImageJ (n =3). Data are presented as mean  $\pm$  SD (one-way ANOVA and Tukey multiple comparisons tests). Scale bar = 50  $\mu$ m. The immunohistochemistry analyses were representative data from three mice. Source data are provided as a Source Data file.

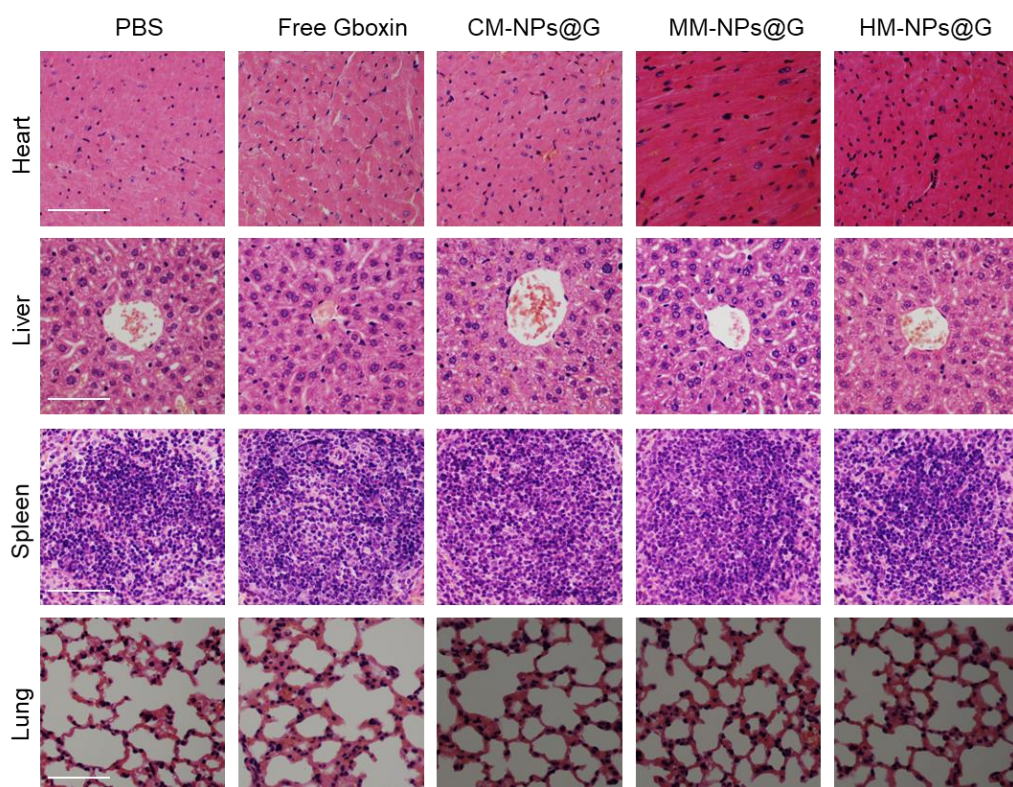

**Supplementary Figure 22 Histological analysis of major organs from mice treated with different treatments.** Histological analyses of the major organs excised from orthotopic U87MG-Luc human glioblastoma tumor-bearing nude mice following different treatments. Images were obtained using an Olympus microscope using a 40 × objective (Scale bar = 40  $\mu$ m). The histological analyses were representative data from three mice.

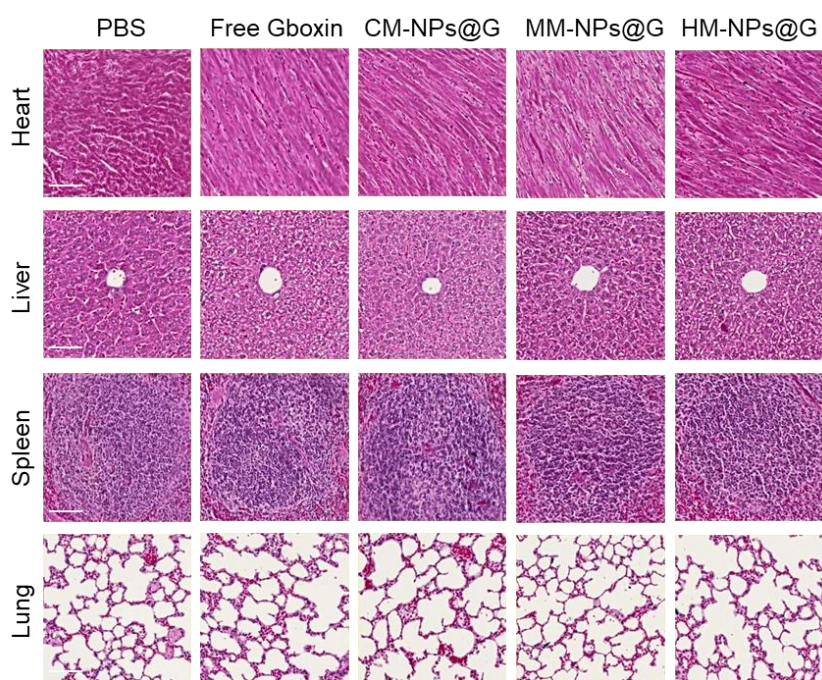

**Supplementary Figure 23 Histological analysis after treatments with different formulations.** Histological analyses of the major organs excised from orthotopic X01-Luc human GSCs bearing nude mice following different treatments. Images were obtained using an Olympus microscope using a 40 × objective (scale bar = 40 μm). The histological analyses were representative data from three mice.

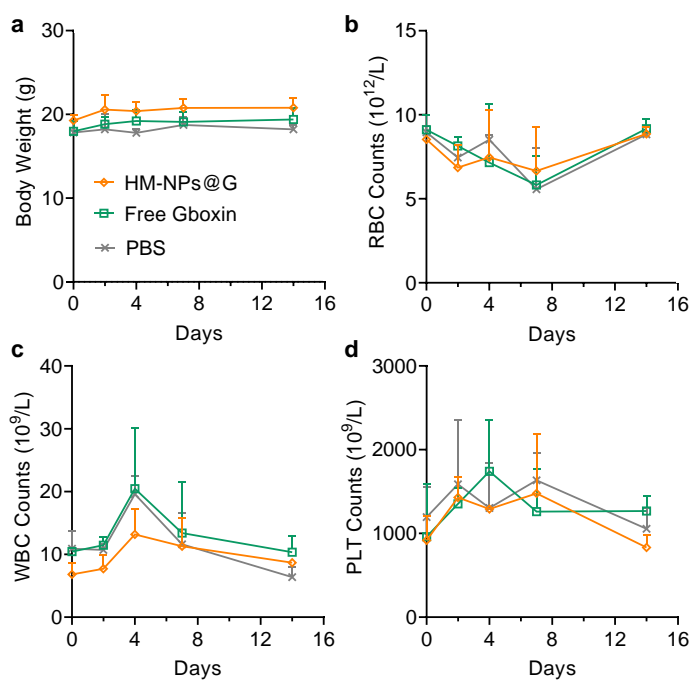

**Supplementary Figure 24 Safety evaluation of HM-NPs@G in vivo.** (a) Body weight changes and blood parameters analysis ((b) RBC counts, (c) WBC counts, and (d) PLT counts) of BALB/c healthy mice treated with HM-NPs@G, free Gboxin (5 mg Gboxin equiv.  $\text{kg}^{-1}$ ) or PBS at day 0, 2, 4, 7 or 14 ( $n = 3$  mice in each group). Data are presented as mean  $\pm$  SD (one-way ANOVA and Tukey multiple comparisons tests). Source data are provided as a Source Data file.



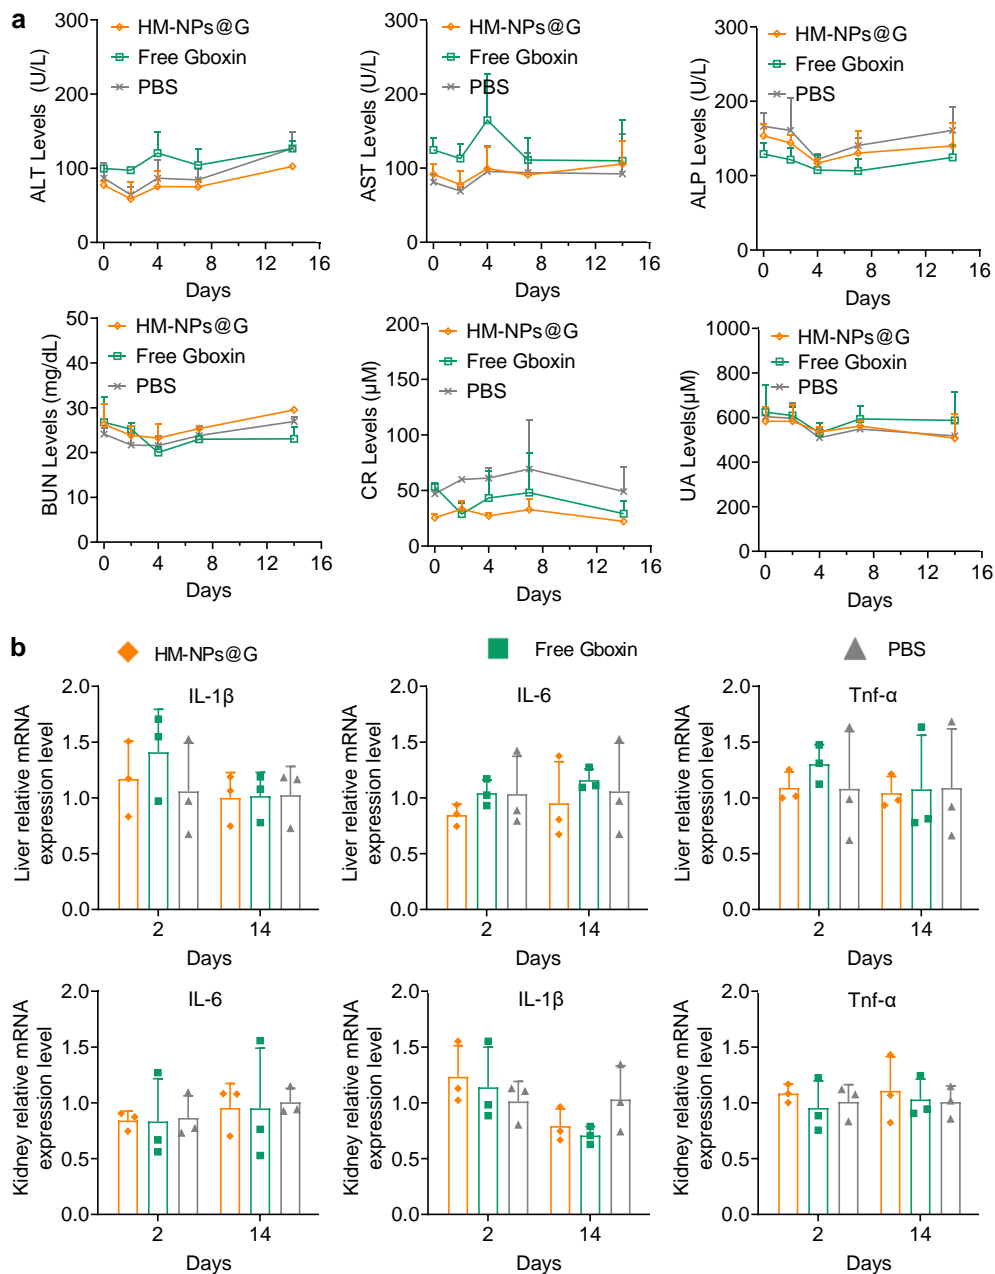

**Supplementary Figure 25 Safety evaluation of HM-NPs@G in vivo. (a)** Blood biochemistry examinations. Assessment of mouse plasma alanine aminotransferase (ALT), aspartate aminotransferase (AST), alkaline phosphatase (ALP), plasma urea (BUN), creatinine (CR), and uric acid (UA) levels after a single-dose nanomedicine treatment. **(b)** Core proinflammatory cytokines such as IL-1 $\beta$ , IL-6, and Tnf- $\alpha$  in the liver and kidney were assessed after being treated with HM-NPs@G, free Gboxin, or PBS at day 2, or day 14 (n = 3)

mice in each group). Data are presented as mean  $\pm$  SD (one-way ANOVA and Tukey multiple comparisons tests). Source data are provided as a Source Data file.

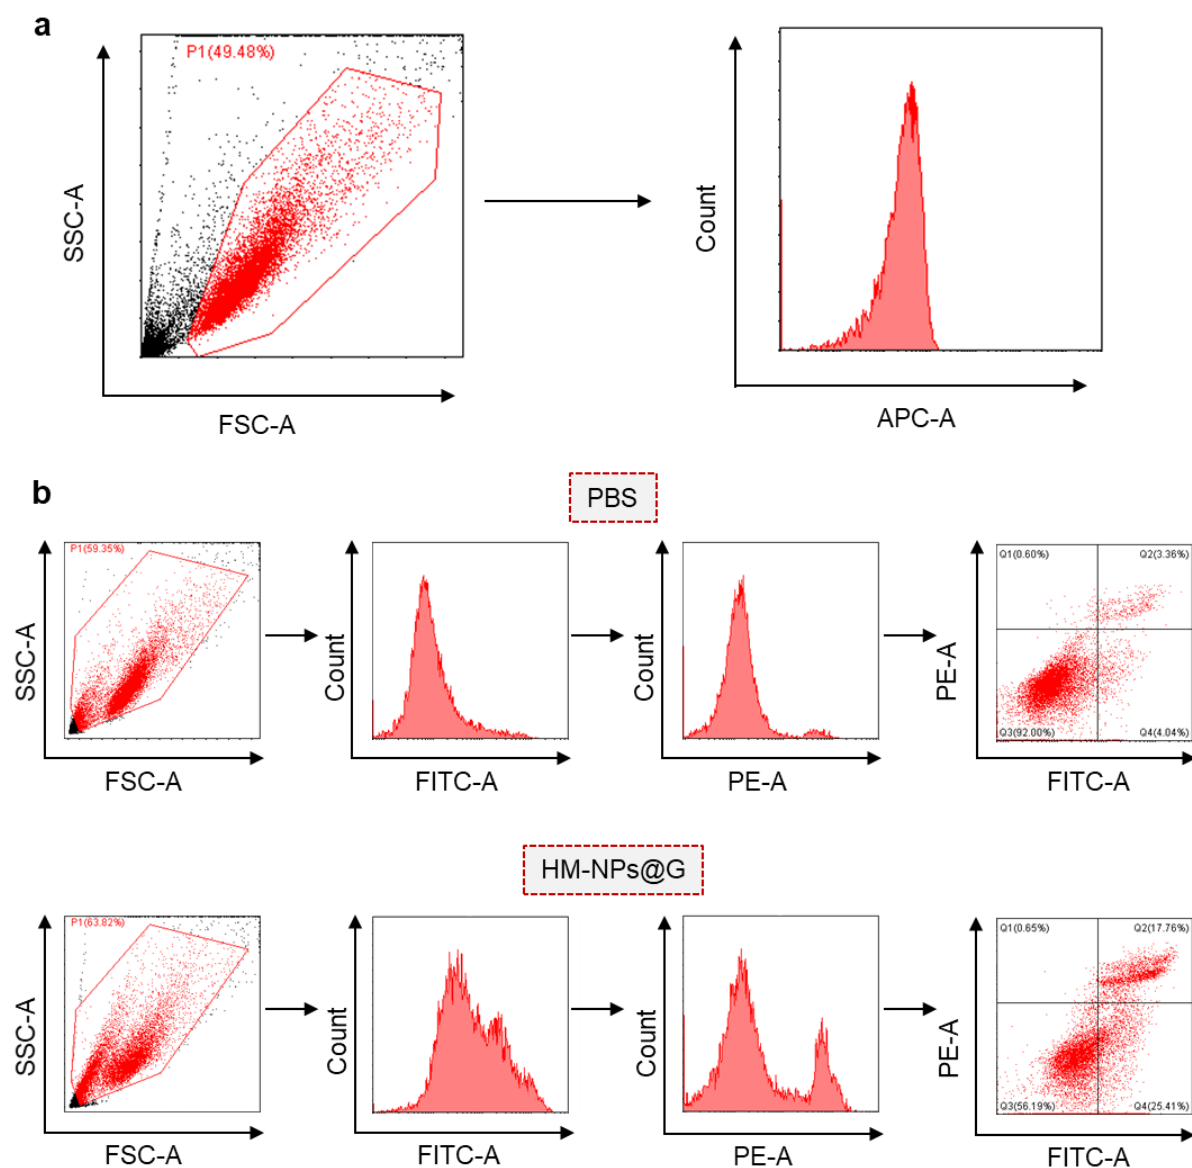

**Supplementary Figure 26 Gating strategy of flow cytometry.** The gating strategy of flow cytometry analysis for the (a) cell uptake and (b) apoptosis in U87MG cells.

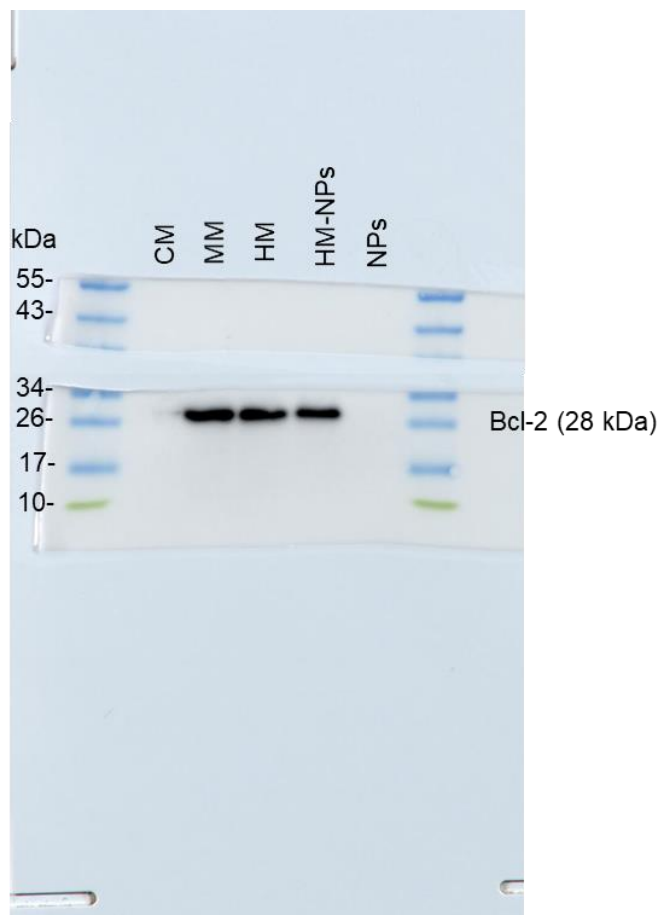

**Supplementary Figure 27 Uncropped scans of blots.** Pieced together scan of the Supplementary Figure 5.
